# Supplementary material for: Deacylated tRNA Accumulation Is a Trigger for Bacterial Antibiotic Persistence Independent of the Stringent Response
Source: PubMed Central journal article supplement (PMC8262941; doi:10.1128/mbio.01132-21), 2021-06-15
Supplement: mbio.01132-21-sf001.pdf [file mbio.01132-21-sf001.pdf]

A.

WT *pheS/pheT*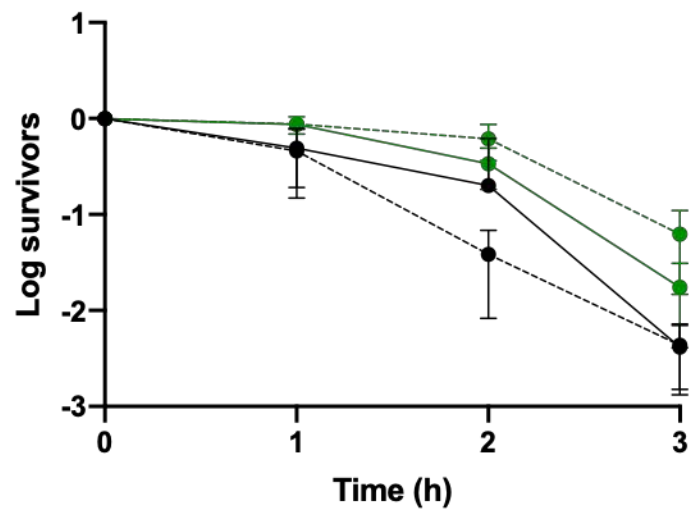

B.

*pheT* G318W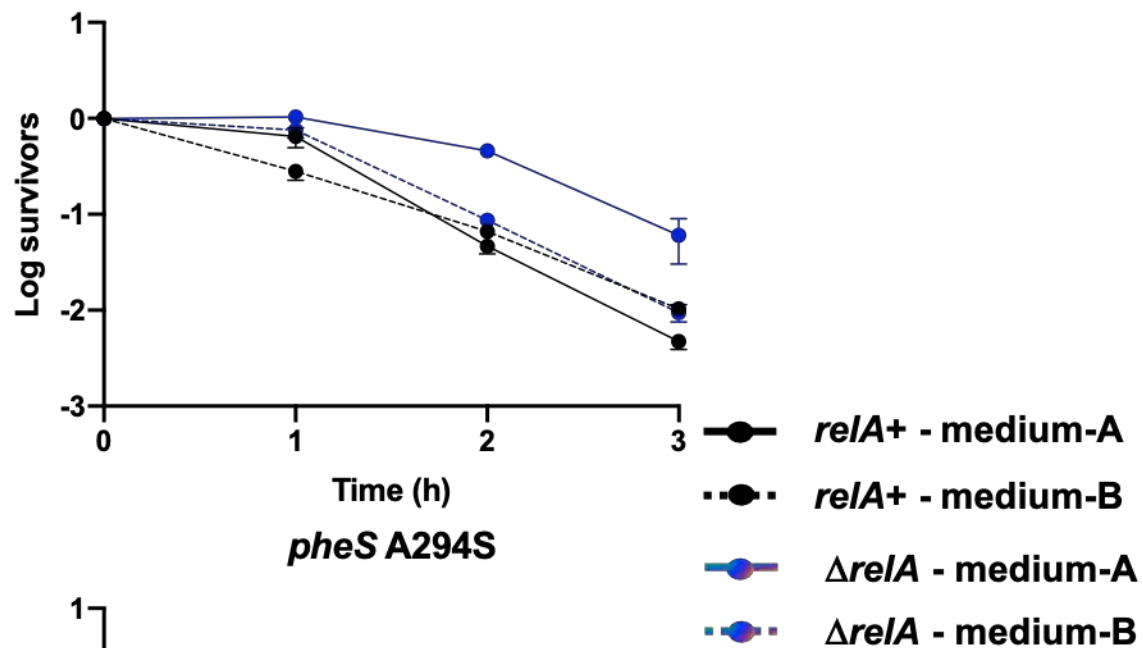

C.

*pheS* A294G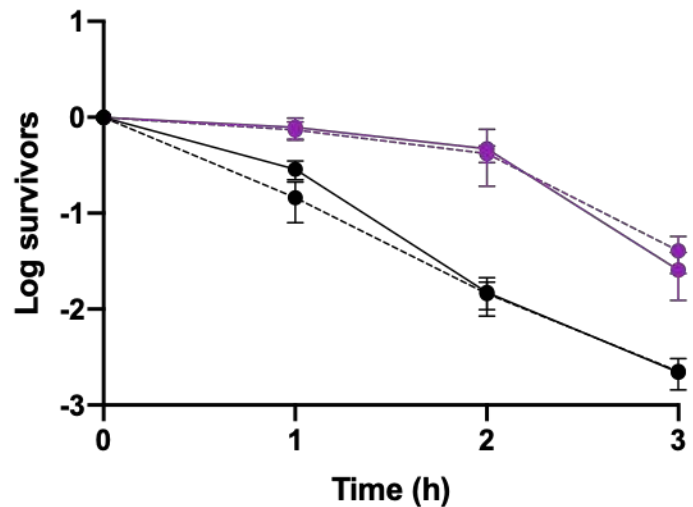

D.

*pheS* A294S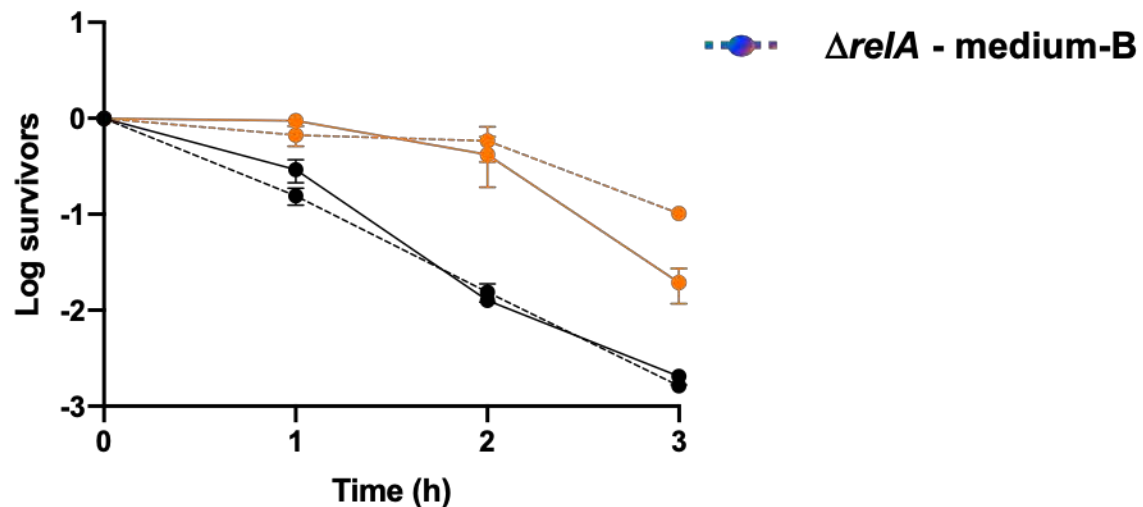

- *relA*<sup>+</sup> - medium-A
- - *relA*<sup>+</sup> - medium-B
- $\Delta$ *relA* - medium-A
- -  $\Delta$ *relA* - medium-B
