# Supplementary material for: Deacylated tRNA Accumulation Is a Trigger for Bacterial Antibiotic Persistence Independent of the Stringent Response
Source: PubMed Central journal article supplement (PMC8262941; doi:10.1128/mbio.01132-21), 2021-06-15

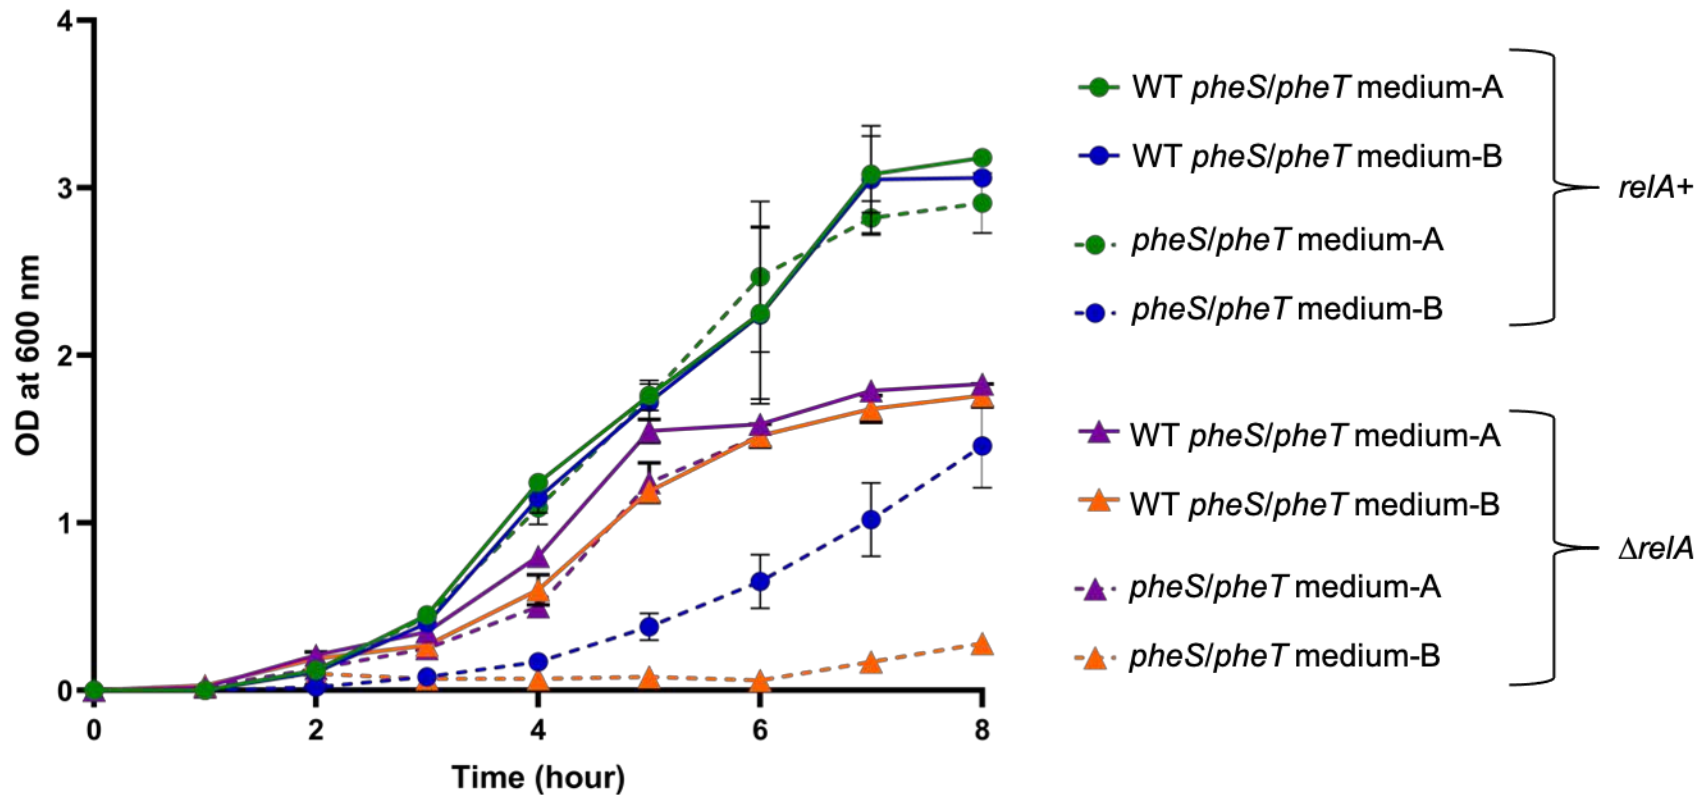

Supplement: mbio.01132-21-sf002.pdf [file mbio.01132-21-sf002.pdf]
