# Supplementary material for: Deacylated tRNA Accumulation Is a Trigger for Bacterial Antibiotic Persistence Independent of the Stringent Response
Source: PubMed Central journal article supplement (PMC8262941; doi:10.1128/mbio.01132-21), 2021-06-15

A. Reaction of  $\alpha$ A294G PheRS with *m*-Try/Tyr and tRNA<sup>Phe</sup>

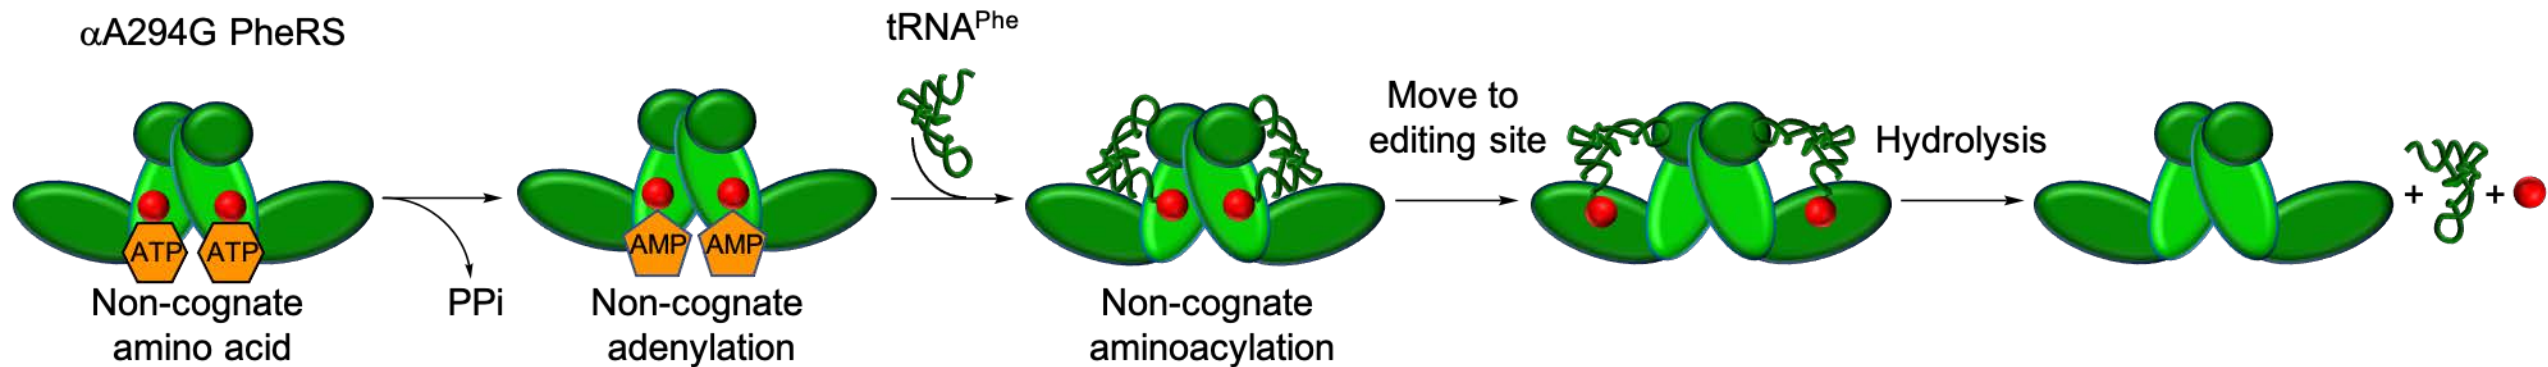

B. Reaction of  $\alpha$ A294S PheRS with *m*-Try/Tyr and tRNA<sup>Phe</sup>

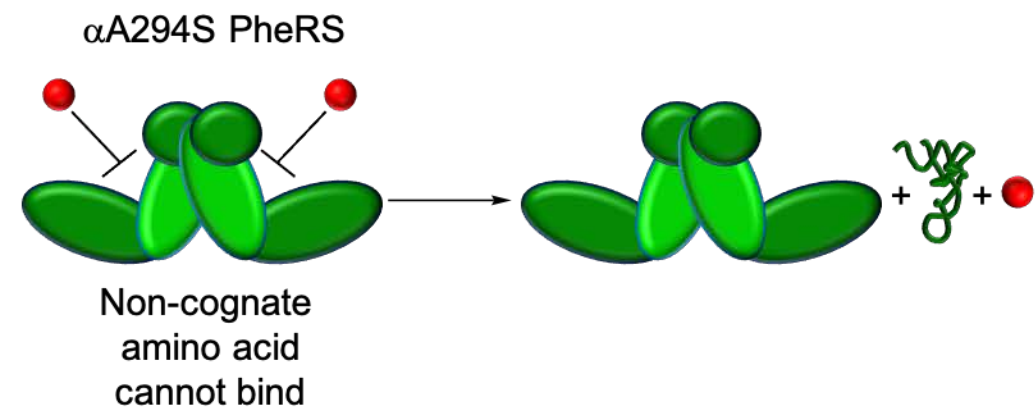

Supplement: mbio.01132-21-sf004.pdf [file mbio.01132-21-sf004.pdf]
